# Supplementary material for: Identification of an Allosteric Binding Site on Human Lysosomal Alpha-Galactosidase Opens the Way to New Pharmacological Chaperones for Fabry Disease
Source: PubMed Central journal article supplement (PMC5082870; doi:10.1371/journal.pone.0165463), 2016-10-27

## Uncropped original from Fig 4 control

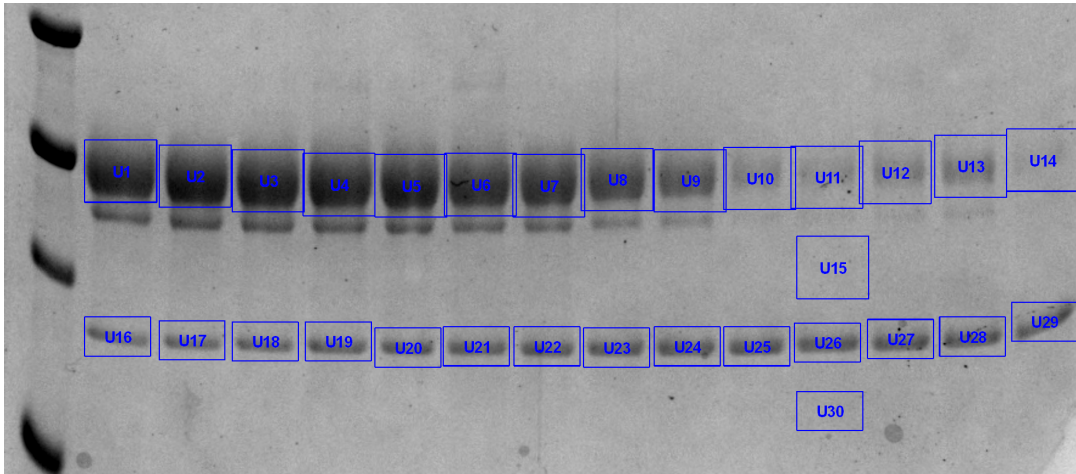

## Uncropped original from Fig 4 +DTP

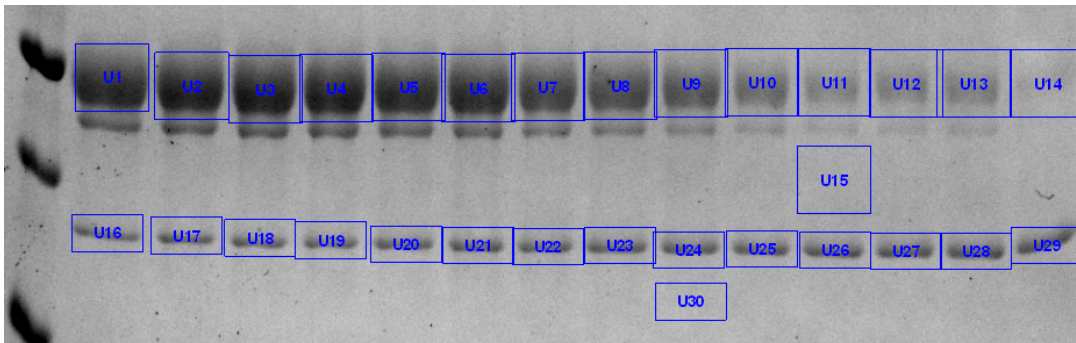

**Uncropped** original Western blots from Fig 8

Panel A

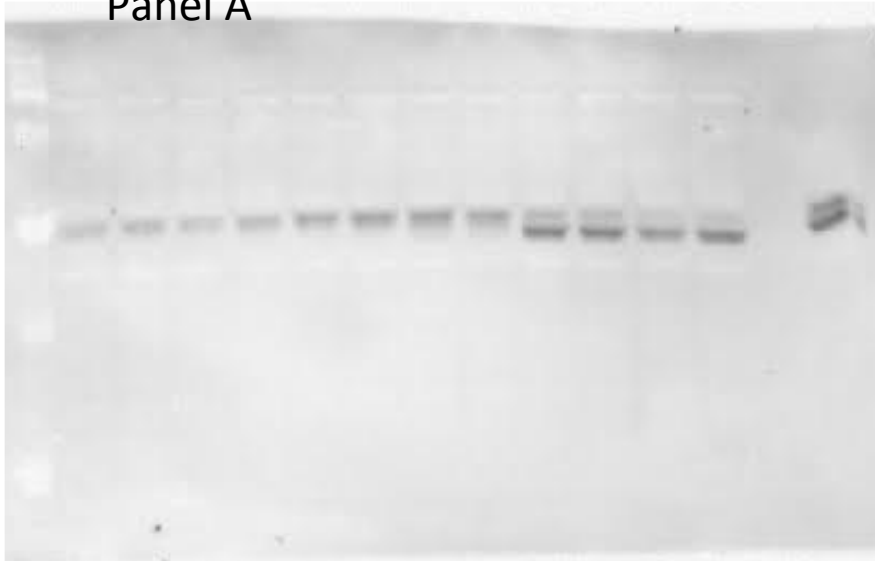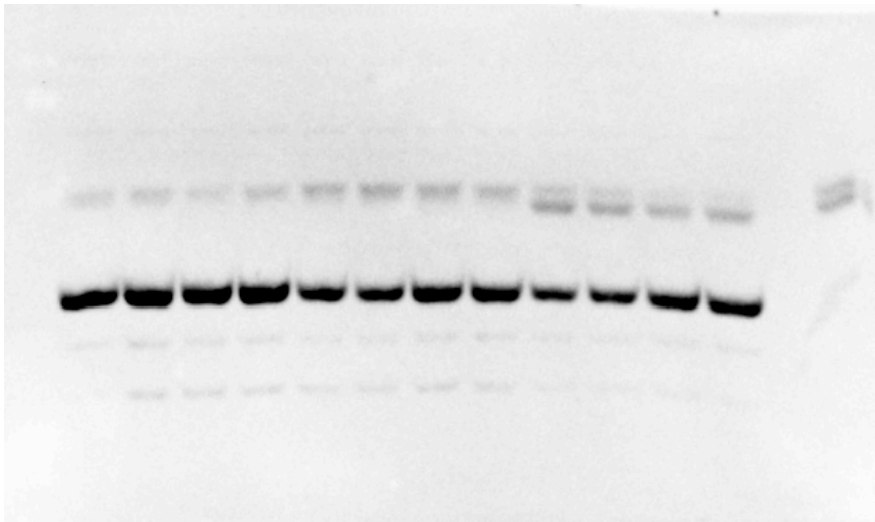

Panel B

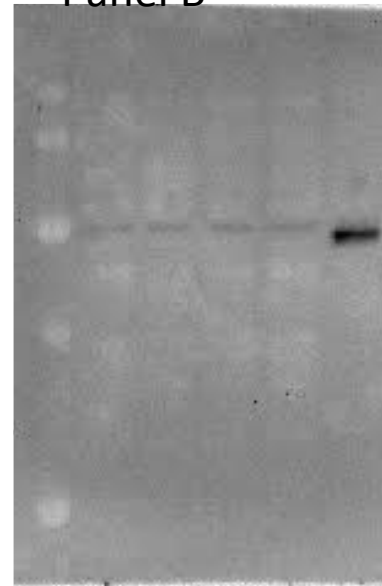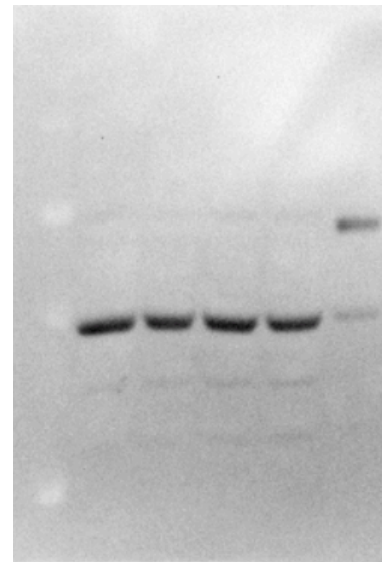

**Uncropped** original Western blots from Fig 7

Panel A

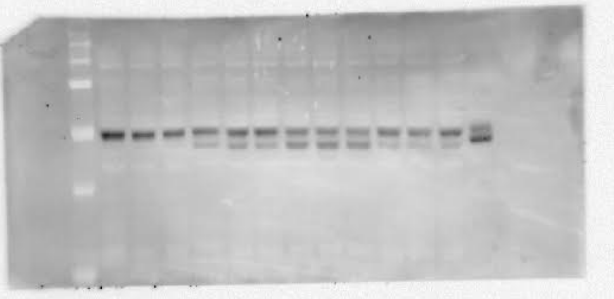

Panel B

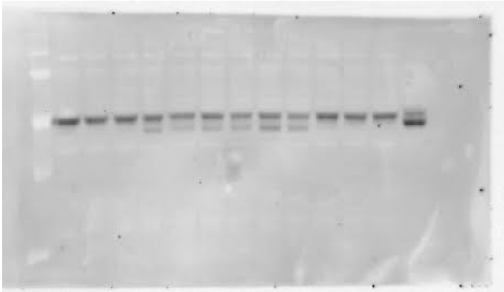

Panel C

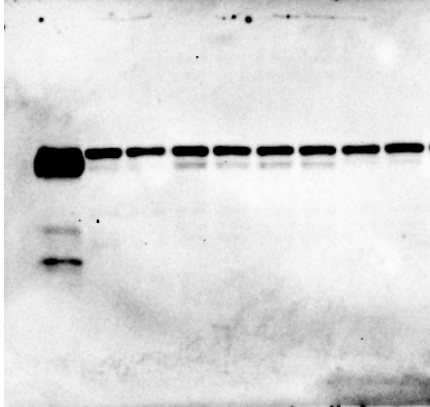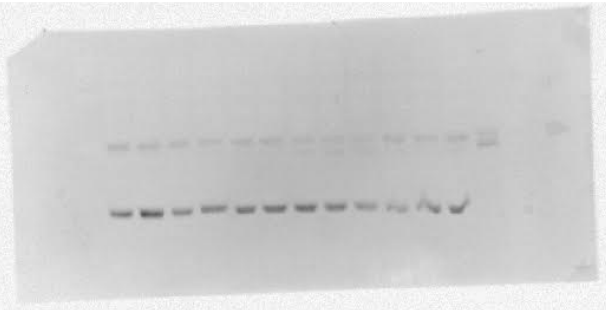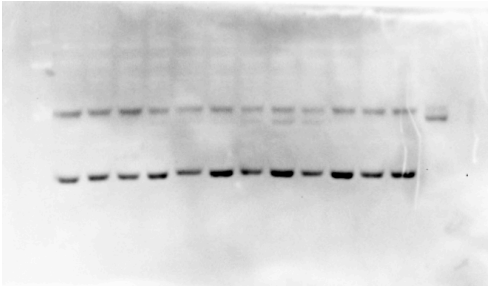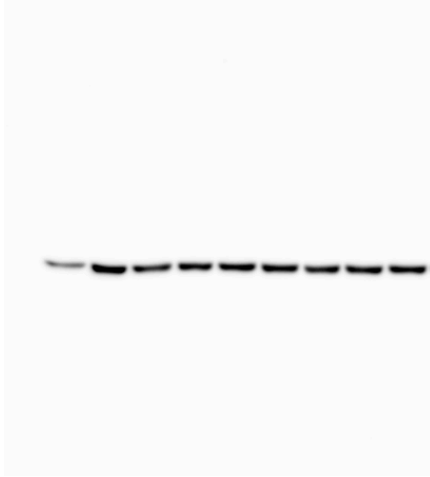

**Uncropped** original Western blots from Fig 6

Panel A

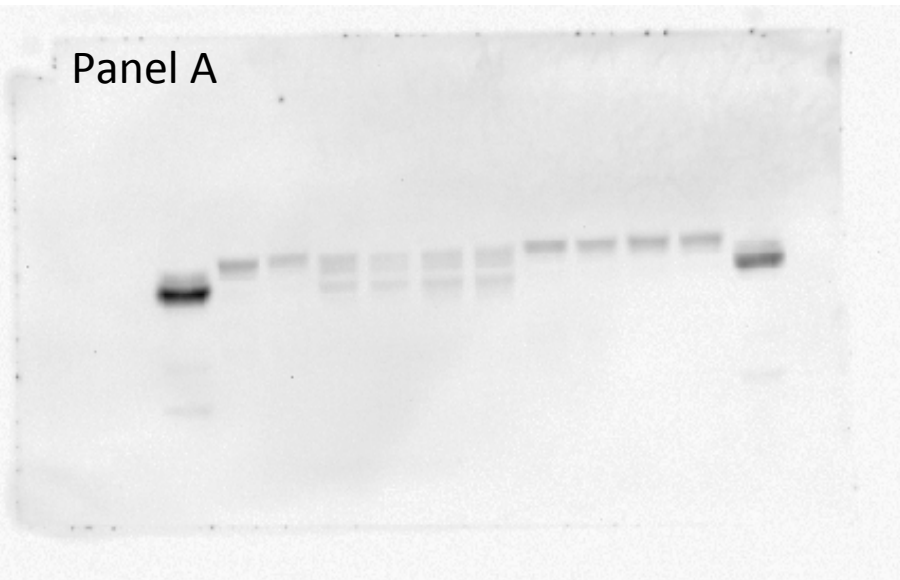

Panel B

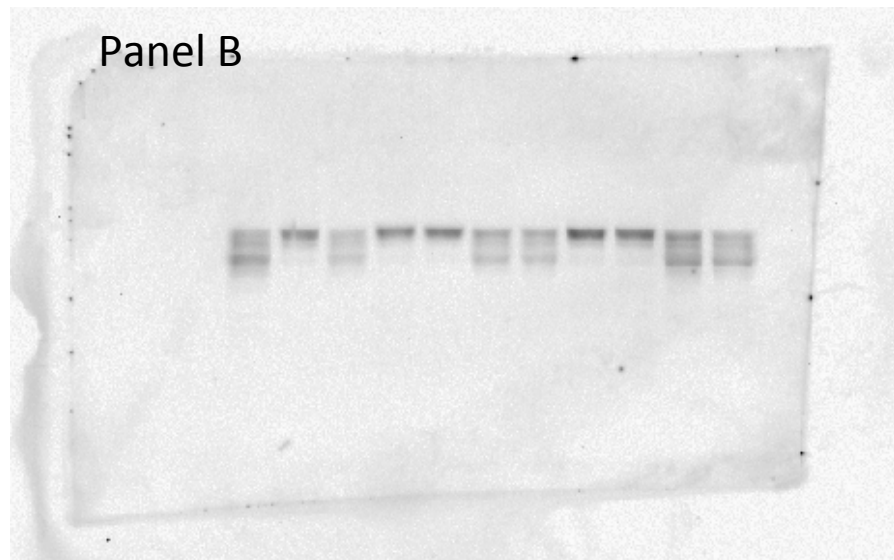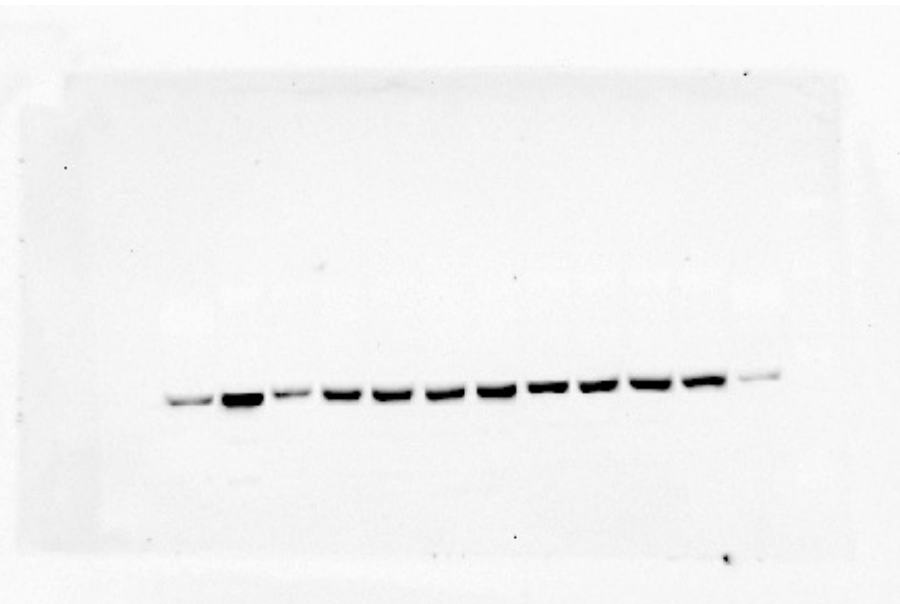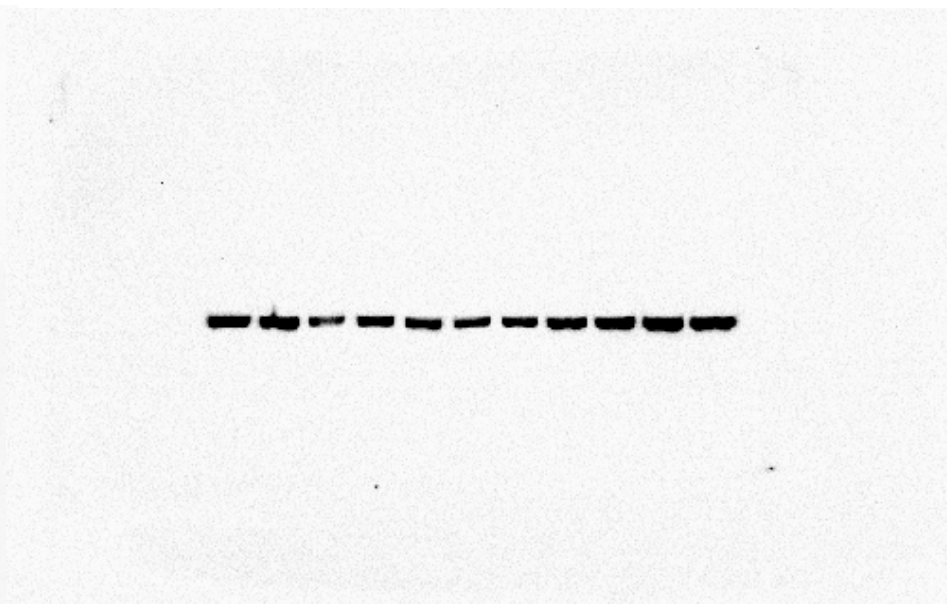

**Uncropped** original Western blots from Fig 6

Panel E

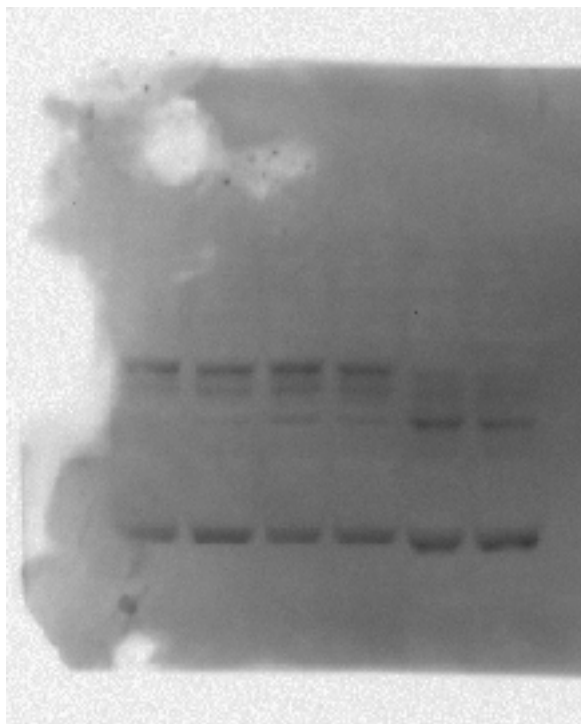

Panel F

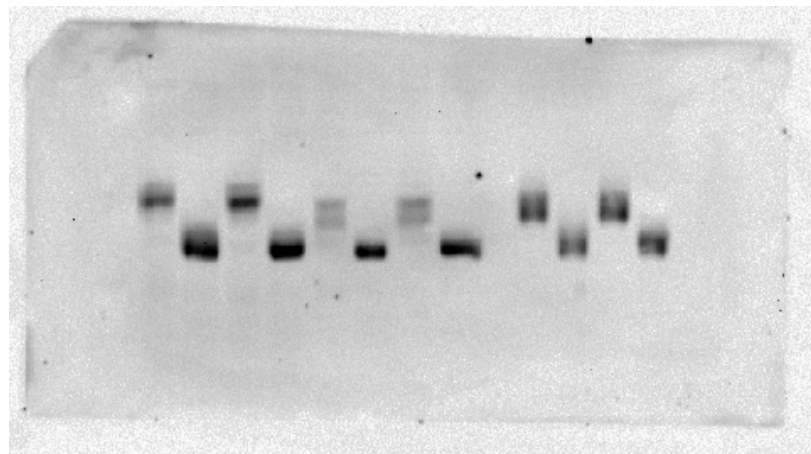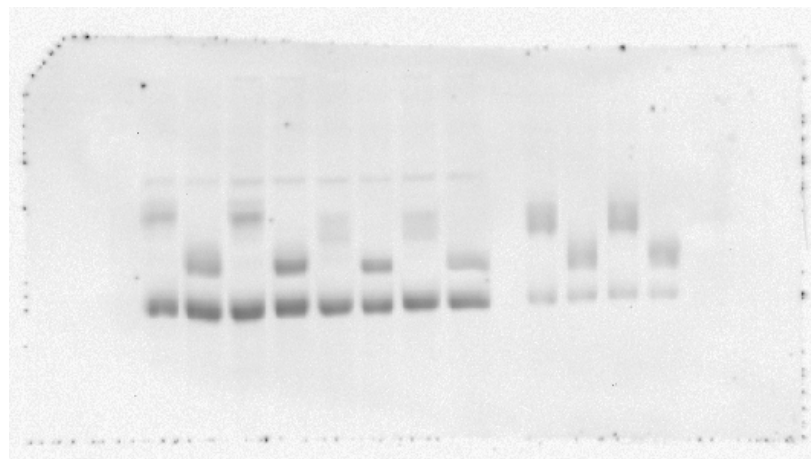

Supplement: pone.0165463.s004.pdf [file pone.0165463.s004.pdf]
